# Supplementary material for: Fixel-based analysis to detect early fiber-specific white matter alterations in sporadic patients with amyotrophic lateral sclerosis
Source: Research Square preprint supplement (doi:10.21203/rs.3.rs-6690773/v1), 2025-06-13
Supplement: Supplementary file 1 [file 067606f3ff70064ffec0bff0.docx]

Supplementary Table 1. Clinical data of patients carrying ALS gene mutations

| No. | Mutant gene | Nucleotide change | Amino acid change |
| --- | --- | --- | --- |
| Adult patient 1 | SOD1 | c.112G>A | p.G38A |
| Adult patient 2 | FUS | c.1561C>T | p.A521C |

Abbreviations: ALS = amyotrophic lateral sclerosis.
