# Supplementary material for: Fixel-based analysis to detect early fiber-specific white matter alterations in sporadic patients with amyotrophic lateral sclerosis
Source: Research Square preprint supplement (doi:10.21203/rs.3.rs-6690773/v1), 2025-06-13
Supplement: Supplementary file 2 [file 4b8259e02ed7f54ab3cabcc0.docx]

Supplemental Table 2 Fiber-specific white matter alterations of early-stage ALS patients

|  |  | **Size** | **Location** | **Peak Z value** | **P value**  **(FWE corrected)** |
| --- | --- | --- | --- | --- | --- |
| **FD** | **Cluster 1** | 68 | 21, -22, 47 | 4.8762 | 0.0320 |
| **Cluster 2** | 80 | -34,6,5 | 4.5214 | 0.0046 |
| **Cluster 3** | 60 | 21,2,23 | 3.5804 | 0.0218 |
| **Cluster 4** | 3692 | -10,14,43 | 5.4967 | 0.0222 |
| **FC** | **Cluster 5** | 89 | -20, -16, -4 | 5.2670 | 0.0342 |
| **Cluster 6** | 325 | 20,4,20 | 5.0813 | 0.0362 |
| **Cluster 7** | 9343 | -9,12,42 | -5.4211 | 0.0090 |
| **FDC** | **Cluster 8** | 773 | 21, 4, 21 | 4.9379 | 0.0080 |
| **Cluster 9** | 540 | -13, -3, 12 | 4.8845 | 0.0080 |
| **Cluster 10** | 81 | -19, -8, 49 | 4.4315 | 0.0126 |

Abbreviations: ALS = amyotrophic lateral sclerosis; FD = fibre density; FC = fibre cross-section; FDC = fibre density and cross-section. Positive z value means HC > ALS-ES, negative z value means HC < ALS-ES. **Cluster 1**, Corticospinal tract R. **Cluster 2**, Sagittal stratum L. **Cluster 3**, Posterior limb of internal capsule R, Retrolenticular part of internal capsule R. **Cluster 4**, Body of corpus callosum, Splenium of corpus callosum, Corticospinal tract L R. **Cluster 5**, Posterior limb of internal capsule L. **Cluster 6**, Posterior limb of internal capsule R, Retrolenticular part of internal capsule R. **Cluster 7**, Body of corpus callosum, Splenium of corpus callosum, Superior fronto-occipital fasciculus R. **Cluster 8**, Posterior limb of internal capsule R, Retrolenticular part of internal capsule R. **Cluster 9**, Posterior limb of internal capsule L, Retrolenticular part of internal capsule L, Superior corona radiata L, Posterior corona radiata L. **Cluster 10**, Body of corpus callosum, Superior corona radiata L, Corticospinal tract L R. Other WM clusters that differ significantly between ALS patients and HCs but cannot be located in the John Hopkins University WM atlas were not shown. L, left; Right, R.
