# Supplementary material for: Fixel-based analysis to detect early fiber-specific white matter alterations in sporadic patients with amyotrophic lateral sclerosis
Source: Research Square preprint supplement (doi:10.21203/rs.3.rs-6690773/v1), 2025-06-13
Supplement: Supplementary file 3 [file 73dd1c66f68609550324b63a.docx]

**Genetic testing**

In the present study, all ALS patients were performed genetic testing, according to the ALS online database and previous reports, thirty-two ALS genes were screened by whole exome sequencing (WES) in ALS patients, including the genes SOD1, ALS2, SETX, FUS, VAPB, TARDBP, OPTN, VCP, UBQLN2, SIGMAR1, FIG4, CHMP2B, PFN1, NEFH, PRPH, TFG, TAF15, GRN, CHCHD10, TUBA4A, TBK1, NEK1, GLE1, MATR3, CCNF, ANXA11, HNRNPA1, SQSTM1, ERBB4, TIA1, SPG11 and KIF5A (1). The procedures have been documented in detail in our previous studies (1). Briefly, the criteria used to detect causative mutations were based on the recommendations of the American College of Medical Genetics. Variant frequencies were initially determined in gnomeAD and Exome Aggregation Consotium to remove the common single nucleotide polymorphisms. Only non-synonymous, splicing and frameshift variants with a minor allele frequency (MAF) of less than 0.5% across all population databases were selected for further analysis. Sanger sequencing was performed to validate the mutations identified by WES. Moreover, C9orf72 repeat expansions were also screened using standard repeat-primed PCR.

**MRI acquisition**

Structural MRI scans were performed in ALS-ES patients and HCs. All MRI data were obtained on a 3.0 T magnetic resonance system (Philips Medical System Ingenia scanner) with dStream head coil. Structural images of the whole brain were scanned using a three‑dimensional (3D) fast spoiled gradient-echo sequence: repetition time (TR) = 6.7 ms, echo time (TE) = 3.0 ms, matrix = 68 × 68, voxel size = 1mm×1mm×1mm, field of view (FOV) = 240 mm × 240 mm, slice thickness = 1.0 mm, no slice gap, and a total of 180 slices. For DWI analyses, we used a spin-echo sequence: TR = 4900 ms, TE = 95 ms, FOV = 224mm×224mm, matrix = 112 ×112, b = 0 and 1000 s/mm2, slice thickness = 2 mm, no slice gap, voxel size = 2mm×2mm×2mm, 32 gradient directions, and a total of 70 slices. FLAIR data were scanned using TR = 7000 ms, Flip Angle 90°, TE = 125 ms, acquisition matrix = 272 ×176, and slice thickness 6 mm.

**Data Preprocessing**

Then, data preprocessing was performed. First, conventional preprocessing steps were performed on each subject’s DTI data, including 1) image denoising, 2) Gibbs ringing removal and 3) eddy correction. Then, bias field correction was performed to eliminate low-frequency intensity inhomogeneities across the image, and global intensity normalization across all subjects was performed. Next, a group average WM response function was calculated on normalized DTI data; then, the DTI data were sampled at 1.25 × 1.25 × 1.25 mm3.

After that, fiber orientation distribution (FOD) images were estimated for each subject using a spherical deconvolution algorithm, and the output WM FOD images of all subjects were used to generate a group WM FOD template. Next, all subjects’ FOD images were registered to the group WM FOD template, and finally, a WM template analysis fixel mask was calculated.

Moreover, using FreeSurfer version 7.1.1 (<http://surfer.nmr.mgh.harvard.edu>), total intracranial volume (TIV) was calculated for each subject for further analysis as a covariate. The procedure has been documented in detail in our previous study (2).

**References**

1 Sun X, Zhao X, Liu Q, et al. Study on sleep-wake disorders in patients with genetic and non-genetic amyotrophic lateral sclerosis. J Neurol Neurosurg Psychiatry. 2020 Oct 21:jnnp-2020-324544.

2. Liu S, Zhao Y, Ren Q, et al. Amygdala abnormalities across disease stages in patients with sporadic amyotrophic lateral sclerosis. Hum Brain Mapp. 2022 Jul 22.
